# Supplementary material for: Identification of disulfide isomerase ERp57 as a target for small molecule cardioprotective agents
Source: Royal Society of Chemistry journal article supplement (doi:10.1039/c5ra08551a), 2015-01-01
Supplement: c5ra08551a1.pdf [file c5ra08551a1.pdf]

# Identification of disulfide isomerase ERp57 as a target for small molecule cardioprotective agent

Guozhen Cui,<sup>‡ab</sup> Luchen Shan,<sup>‡c</sup> Ivan Keung Chu,<sup>d</sup> Guohui Li,<sup>d</sup> George Pak Heng

Leung,<sup>e</sup> Yuqiang Wang<sup>c</sup> Maggie Pui Man Hoi,<sup>\*a</sup> Simon Ming Yuen Lee<sup>\*a</sup>

<sup>a</sup>State Key Laboratory of Quality Research in Chinese Medicine and Institute of Chinese Medical Sciences, University of Macau, Macao, China. E-mail: maghoi.um@gmail.com; simonlee@umac.mo; Tel: +853-8822-4695

<sup>b</sup>Department of Bioengineering, Zhuhai Campus of Zunyi Medical University, Guangdong, Zhuhai, China

<sup>c</sup>Institute of New Drug Research, College of Pharmacy, Jinan University, Guangzhou, China

<sup>d</sup>Department of Chemistry, The University of Hong Kong, Hong Kong, China

<sup>e</sup>Department of Pharmacology and Pharmacy, Li Ka Shing Faculty of Medicine, The University of Hong Kong, China

Supplementary Table 1. Proteins identified by pull down and mass spectrometry

| # | Accession no. | Protein name                             | Protein function                                                              |
|---|---------------|------------------------------------------|-------------------------------------------------------------------------------|
| 1 | P11598        | ERp57                                    | Cell redox homeostasis, platelet aggregation, protein folding                 |
| 2 | G3V6T7        | ERp72                                    | Cell redox homeostasis, protein folding                                       |
| 3 | Q63081        | ERp5                                     | Cell redox homeostasis, platelet aggregation, calcium ion binding             |
| 4 | Q63716        | Peroxiredoxin-1                          | Involved in redox regulation of the cell                                      |
| 5 | P35704        | Peroxiredoxin-2                          | Involved in redox regulation of the cell                                      |
| 6 | P63102        | 14-3-3 protein zeta/delta                | Thought to have phospholipase A2 activity                                     |
| 7 | P07150        | Annexin A1                               | Regulates phospholipase A2 activity and binds calcium ions with high affinity |
| 8 | P63029        | Translationally-controlled tumor protein | Involved in calcium binding and microtubule stabilization                     |
